# Supplementary material
Source: PubMed Central journal article supplement (PMC1820714)

**A**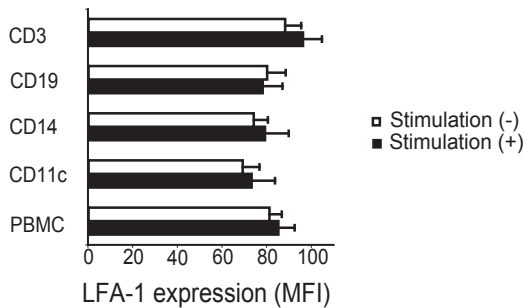**B**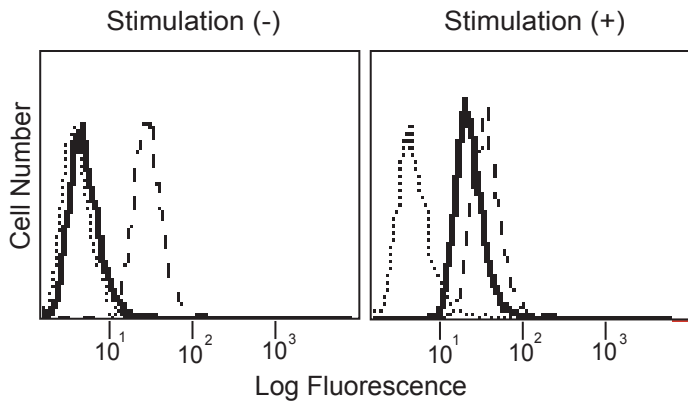

Supplement: pnas_0608491104_1.pdf [file pnas_0608491104_1.pdf]

A (Ku70-siRNA)

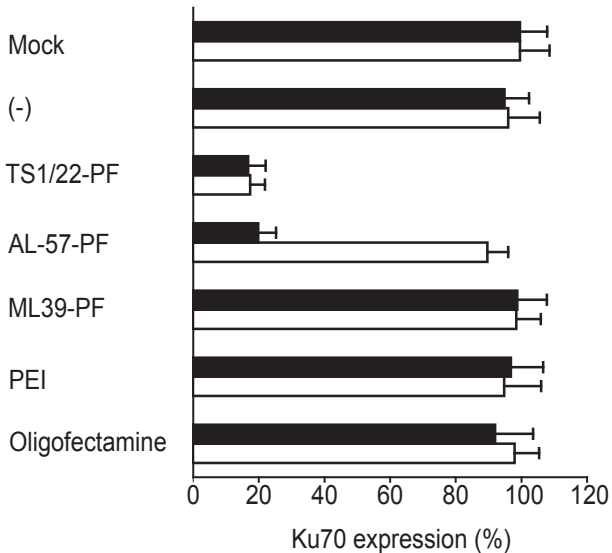

B (CD4-siRNA)

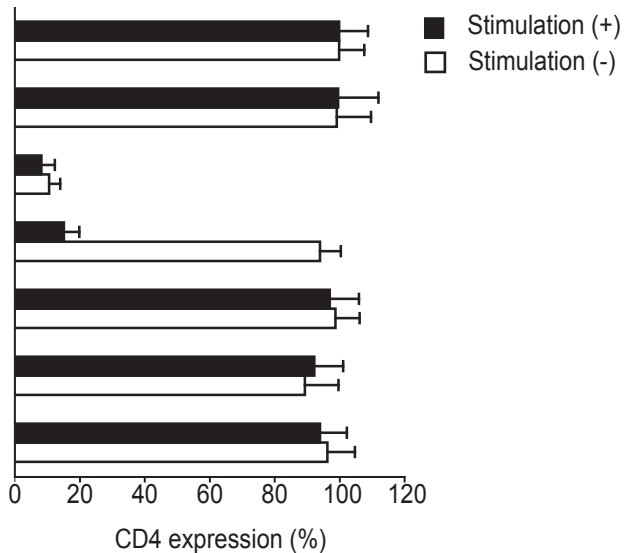

Supplement: pnas_0608491104_2.pdf [file pnas_0608491104_2.pdf]

### Protamine + Ku70-siRNA

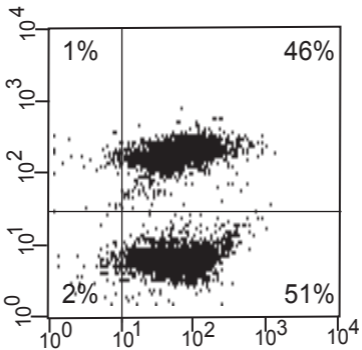

### ML39-PF + Ku70-siRNA

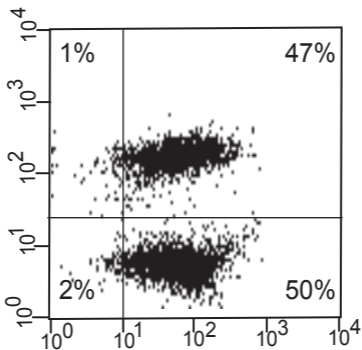

### TS1/22-PF + Luciferase-siRNA

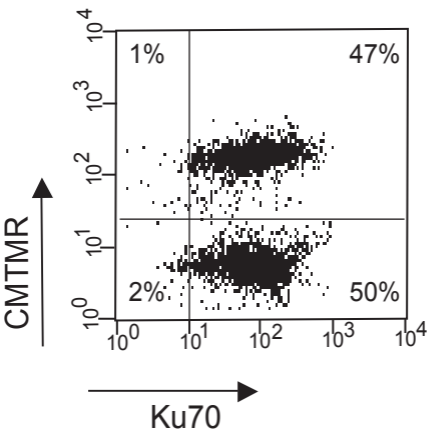

Supplement: pnas_0608491104_3.pdf [file pnas_0608491104_3.pdf]

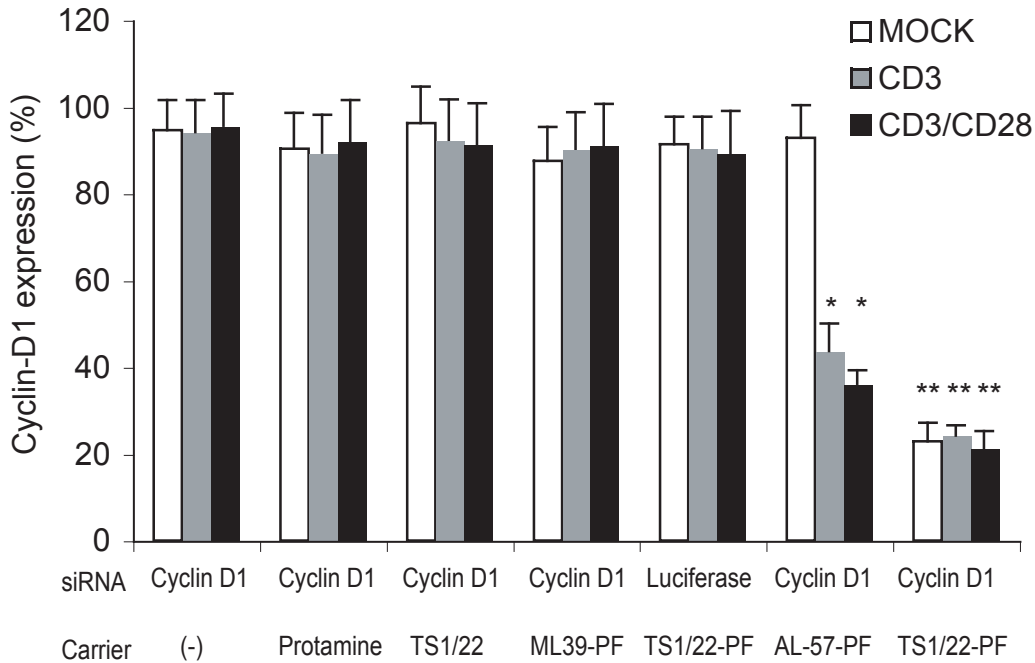

Supplement: pnas_0608491104_4.pdf [file pnas_0608491104_4.pdf]

A. AL-57-PF

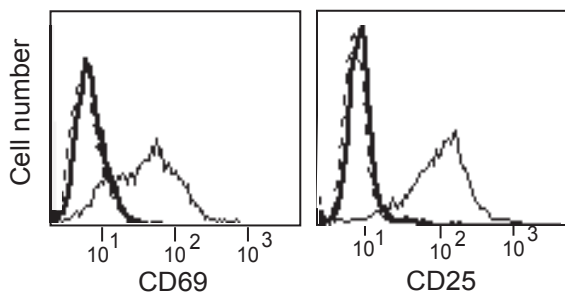

B. TS1/22-PF

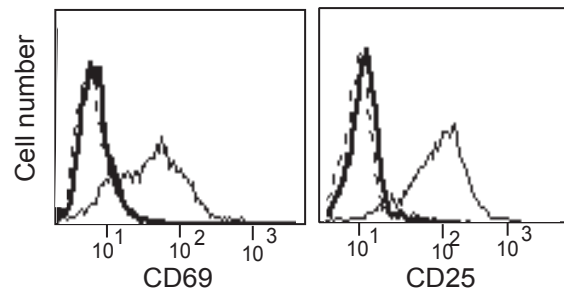

C.

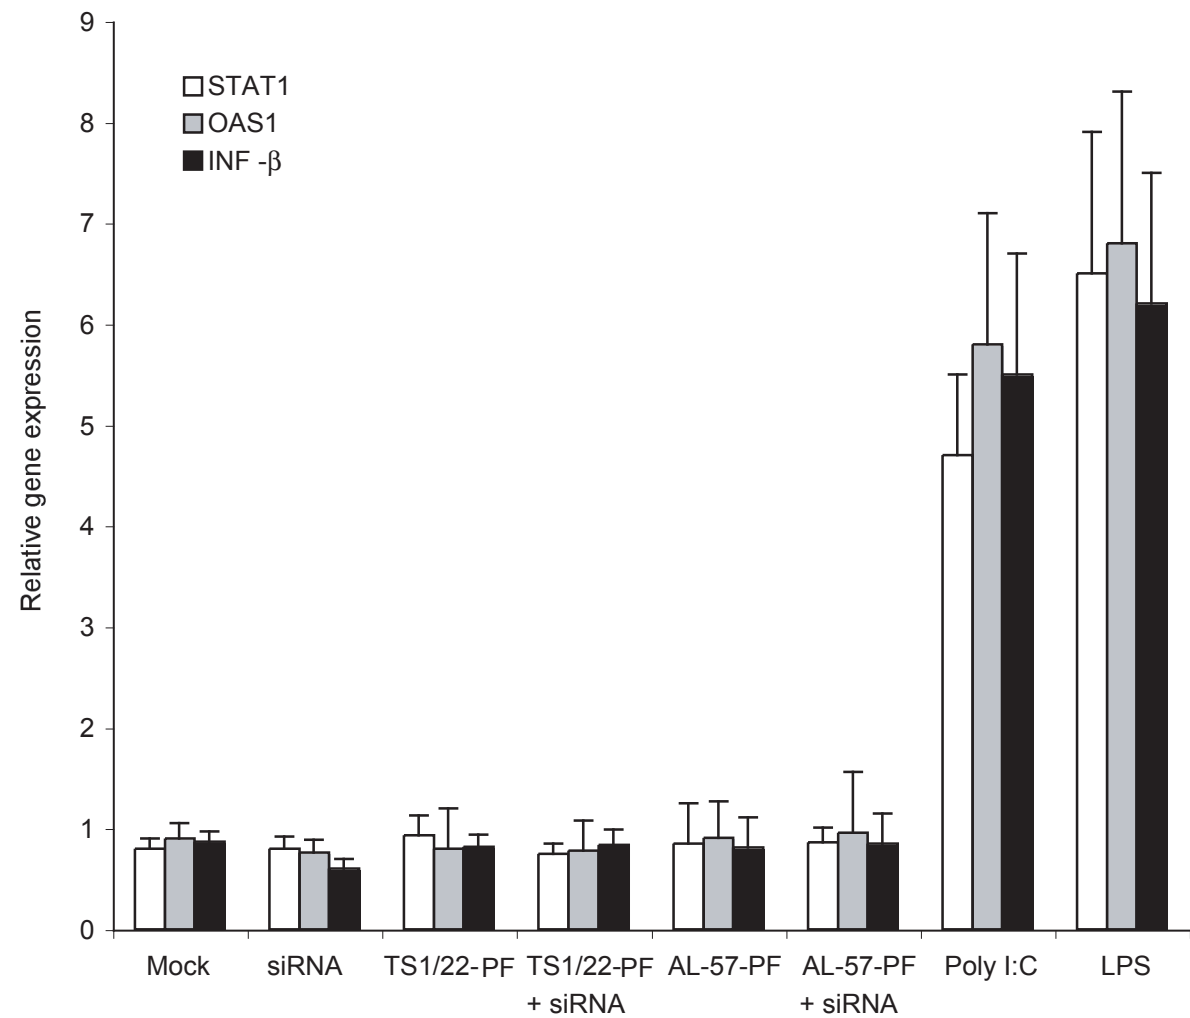

Supplement: pnas_0608491104_5.pdf [file pnas_0608491104_5.pdf]
